# Supplementary material
Source: Springer Nature journal article supplement (https://www.springermedizin.de/resource/supplementary/12916_2010_313_MOESM17_ESM.pdf/9599614)

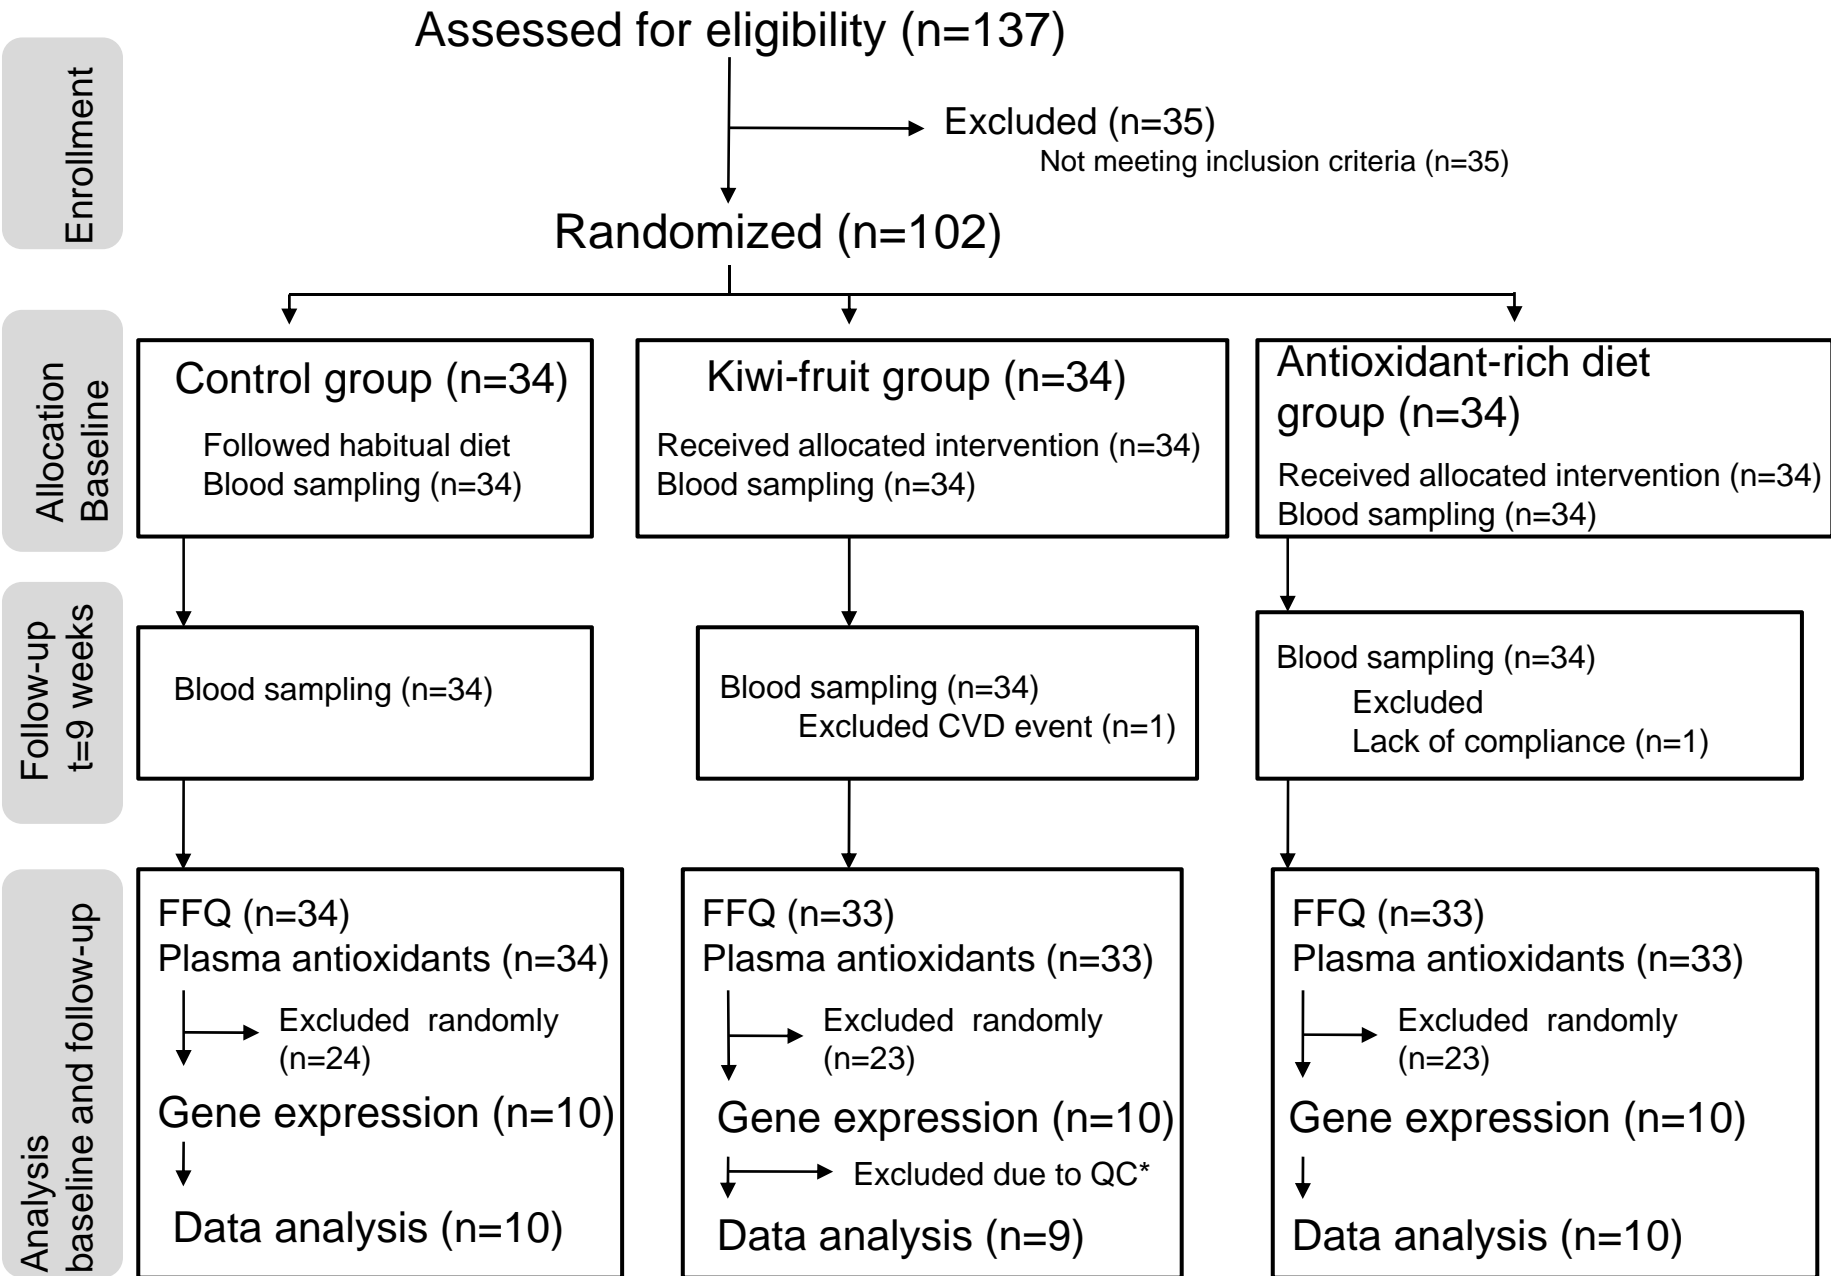

\*QC quality control

Supplement: MOESM17 [file 9599614]
